# Supplementary material for: Large-scale screening of metal hydrides for hydrogen storage from first-principles calculations based on equilibrium reaction thermodynamics
Source: Royal Society of Chemistry journal article supplement (doi:10.1039/c0cp02950e), 2011-01-01
Supplement: c0cp02950e.pdf [file c0cp02950e.pdf]

*Supplementary Information For*

**Large-scale screening of metal hydrides for hydrogen storage from first-principles calculations based on equilibrium reaction thermodynamics**

Ki Chul Kim<sup>1</sup>, Anant D. Kulkarni<sup>2</sup>, J. Karl Johnson<sup>2</sup>, and David S. Sholl<sup>1\*</sup>

<sup>1</sup>*School of Chemical and Biomolecular Engineering, Georgia Institute of Technology,  
311 Ferst Dr., Atlanta, GA, 30332-0100, USA*

<sup>2</sup>*Department of Chemical and Petroleum Engineering, University of Pittsburgh,  
Pittsburgh, PA, 15261, USA*

**DFT optimization of crystal structures**

We updated our original database by including 147 new crystal compounds whose structures are currently available. The compounds are listed in Table S1 and the detailed structural information is shown in Table S2.

**Table S1.** List of 359 compounds included in our database.

| <b>One-element compounds</b>                    |                                                 |                                   |                                |                                 |
|-------------------------------------------------|-------------------------------------------------|-----------------------------------|--------------------------------|---------------------------------|
| Al                                              | B                                               | C                                 | Ca                             | K                               |
| Li                                              | Mg                                              | Na                                | Sc                             | Si                              |
| Ti                                              | V                                               |                                   |                                |                                 |
| <b>Two-element compounds</b>                    |                                                 |                                   |                                |                                 |
| AlB <sub>2</sub>                                | AlB <sub>12</sub>                               | Al <sub>4</sub> C <sub>3</sub>    | Al <sub>2</sub> Ca             | Al <sub>4</sub> Ca              |
| AlH <sub>3</sub>                                | AlLi                                            | Al <sub>2</sub> Li <sub>3</sub>   | Al <sub>3</sub> Li             | Al <sub>4</sub> Li <sub>9</sub> |
| Al <sub>12</sub> Mg <sub>17</sub>               | Al <sub>14</sub> Mg <sub>13</sub>               | Al <sub>30</sub> Mg <sub>23</sub> | AlN                            | AlSc                            |
| AlSc <sub>2</sub>                               | Al <sub>2</sub> Sc                              | Al <sub>3</sub> Sc                | AlTi                           | AlTi <sub>3</sub>               |
| Al <sub>2</sub> Ti                              | Al <sub>3</sub> Ti                              | AlV                               | AlV <sub>3</sub>               | Al <sub>3</sub> V               |
| Al <sub>10</sub> V                              | Al <sub>23</sub> V <sub>4</sub>                 | Al <sub>45</sub> V <sub>7</sub>   | B <sub>4</sub> C               | B <sub>13</sub> C <sub>2</sub>  |
| B <sub>3</sub> Ca <sub>4</sub> LiN <sub>6</sub> | (B <sub>10</sub> H <sub>13</sub> ) <sub>2</sub> | BN                                | B <sub>13</sub> N <sub>2</sub> | C <sub>2</sub> Ca               |
| C <sub>2</sub> N <sub>2</sub>                   | C <sub>3</sub> N <sub>4</sub>                   | C <sub>5</sub> N <sub>4</sub>     | C <sub>12</sub> N <sub>6</sub> | CaB <sub>4</sub>                |
| CaB <sub>6</sub>                                | CaH <sub>2</sub>                                | CaLi <sub>2</sub>                 | CaMg <sub>2</sub>              | CaN <sub>6</sub>                |
| Ca <sub>2</sub> N                               | Ca <sub>3</sub> N <sub>2</sub>                  | Ca <sub>11</sub> N <sub>8</sub>   | CaSi                           | CaSi <sub>2</sub>               |
| Ca <sub>2</sub> Si                              | Ca <sub>5</sub> Si <sub>3</sub>                 | KB <sub>6</sub>                   | KC <sub>8</sub>                | K <sub>2</sub> C <sub>2</sub>   |
| KH                                              | KN <sub>3</sub>                                 | K <sub>3</sub> N                  | KSi                            | K <sub>4</sub> Si <sub>4</sub>  |
| K <sub>8</sub> Si <sub>46</sub>                 | LiB                                             | Li <sub>5</sub> B <sub>4</sub>    | Li <sub>2</sub> C <sub>2</sub> | LiH                             |

\* Corresponding author. Email: david.sholl@chbe.gatech.edu

|                                                 |                                                   |                                                   |                                                                 |                                                  |
|-------------------------------------------------|---------------------------------------------------|---------------------------------------------------|-----------------------------------------------------------------|--------------------------------------------------|
| LiMg                                            | LiN <sub>3</sub>                                  | Li <sub>3</sub> N                                 | LiSi                                                            | Li <sub>2</sub> Si                               |
| Li <sub>7</sub> Si <sub>2</sub>                 | Li <sub>12</sub> Si <sub>7</sub>                  | Li <sub>13</sub> Si <sub>4</sub>                  | Li <sub>15</sub> Si <sub>4</sub>                                | MgB <sub>2</sub>                                 |
| MgB <sub>4</sub>                                | MgB <sub>7</sub>                                  | MgC <sub>2</sub>                                  | Mg <sub>2</sub> C <sub>3</sub>                                  | MgH <sub>2</sub>                                 |
| Mg <sub>3</sub> N <sub>2</sub>                  | MgSc                                              | Mg <sub>2</sub> Si                                | Mg <sub>5</sub> Si <sub>6</sub>                                 | N <sub>4</sub> Si <sub>3</sub>                   |
| NaB <sub>15</sub>                               | Na <sub>3</sub> B <sub>20</sub>                   | Na <sub>2</sub> C <sub>2</sub>                    | NaH                                                             | NaN <sub>3</sub>                                 |
| Na <sub>3</sub> N                               | NaSi                                              | Na <sub>4</sub> Si <sub>4</sub>                   | Na <sub>8</sub> Si <sub>46</sub>                                | ScB <sub>2</sub>                                 |
| ScB <sub>12</sub>                               | ScC                                               | Sc <sub>2</sub> C                                 | Sc <sub>2</sub> C <sub>3</sub>                                  | Sc <sub>3</sub> C <sub>4</sub>                   |
| Sc <sub>4</sub> C <sub>3</sub>                  | Sc <sub>15</sub> C <sub>19</sub>                  | ScH <sub>2</sub>                                  | ScN                                                             | ScSi                                             |
| ScSi <sub>2</sub>                               | Sc <sub>5</sub> Si <sub>3</sub>                   | SiB <sub>3</sub>                                  | SiB <sub>6</sub>                                                | SiC                                              |
| SiH                                             | TiB                                               | TiB <sub>2</sub>                                  | TiC                                                             | Ti <sub>2</sub> C                                |
| Ti <sub>8</sub> C <sub>5</sub>                  | TiH                                               | TiH <sub>2</sub>                                  | TiN                                                             | Ti <sub>2</sub> N                                |
| TiSi                                            | TiSi <sub>2</sub>                                 | Ti <sub>5</sub> Si <sub>3</sub>                   | Ti <sub>5</sub> Si <sub>4</sub>                                 | TiV                                              |
| VB                                              | VB <sub>2</sub>                                   | V <sub>2</sub> B <sub>3</sub>                     | V <sub>3</sub> B <sub>2</sub>                                   | VC                                               |
| V <sub>2</sub> C                                | V <sub>6</sub> C <sub>5</sub>                     | V <sub>8</sub> C <sub>7</sub>                     | VH <sub>2</sub>                                                 | V <sub>2</sub> H                                 |
| VN                                              | V <sub>2</sub> N                                  | VSi <sub>2</sub>                                  | V <sub>3</sub> Si                                               | V <sub>5</sub> Si <sub>3</sub>                   |
| V <sub>6</sub> Si <sub>5</sub>                  |                                                   |                                                   |                                                                 |                                                  |
| <b>Three-element compounds</b>                  |                                                   |                                                   |                                                                 |                                                  |
| Al(BH <sub>4</sub> ) <sub>3</sub>               | Al <sub>5</sub> C <sub>3</sub> N                  | Al <sub>6</sub> C <sub>3</sub> N <sub>2</sub>     | Al <sub>7</sub> C <sub>3</sub> N <sub>3</sub>                   | Al <sub>8</sub> C <sub>3</sub> N <sub>4</sub>    |
| Al <sub>2</sub> Ca <sub>3</sub> N <sub>4</sub>  | Al <sub>2</sub> CaSi <sub>2</sub>                 | Al <sub>2</sub> Ca <sub>3</sub> Si <sub>2</sub>   | AlLi <sub>3</sub> N <sub>2</sub>                                | AlLiSi                                           |
| Al <sub>3</sub> Li <sub>8</sub> Si <sub>5</sub> | Al <sub>3</sub> Li <sub>12</sub> Si <sub>4</sub>  | Al <sub>2</sub> MgC <sub>2</sub>                  | AlMg <sub>4</sub> Si <sub>6</sub>                               | Al <sub>18</sub> Mg <sub>3</sub> Ti <sub>2</sub> |
| AlSc <sub>2</sub> Si <sub>2</sub>               | BC <sub>2</sub> N                                 | C <sub>2</sub> H <sub>4</sub> N <sub>4</sub>      | C <sub>2</sub> H <sub>18</sub> N <sub>18</sub>                  | C <sub>2</sub> N <sub>2</sub> (NH)               |
| CaAlH <sub>5</sub>                              | Ca(AlH <sub>4</sub> ) <sub>2</sub>                | Ca <sub>4</sub> Al <sub>3</sub> Mg                | Ca <sub>3</sub> AlN <sub>3</sub>                                | CaAlSi                                           |
| CaB <sub>2</sub> C <sub>2</sub>                 | Ca(BH <sub>4</sub> ) <sub>2</sub>                 | CaB <sub>12</sub> H <sub>12</sub>                 | Ca <sub>3</sub> BN <sub>3</sub>                                 | CaCN <sub>2</sub>                                |
| CaC <sub>4</sub> N <sub>6</sub>                 | Ca <sub>2</sub> HN                                | CaLiN                                             | CaLiSi <sub>2</sub>                                             | Ca <sub>2</sub> LiSi <sub>3</sub>                |
| CaMg <sub>2</sub> N <sub>2</sub>                | CaMgSi                                            | Ca <sub>4</sub> N <sub>2</sub> (CN <sub>2</sub> ) | Ca <sub>11</sub> N <sub>6</sub> (CN <sub>2</sub> ) <sub>2</sub> | Ca <sub>2</sub> N <sub>3</sub> V                 |
| Ca <sub>3</sub> N <sub>3</sub> V                | CaSiN <sub>2</sub>                                | Ca <sub>2</sub> Si <sub>5</sub> N <sub>8</sub>    | Ca <sub>5</sub> (Si <sub>2</sub> N <sub>6</sub> )               | Ca <sub>4</sub> TiN <sub>4</sub>                 |
| H <sub>9</sub> CN <sub>9</sub>                  | KAlH <sub>4</sub>                                 | K <sub>3</sub> AlH <sub>6</sub>                   | KBH <sub>4</sub>                                                | KB <sub>21</sub> H <sub>18</sub>                 |
| K <sub>2</sub> B <sub>6</sub> H <sub>6</sub>    | K <sub>2</sub> (B <sub>10</sub> H <sub>10</sub> ) | K <sub>2</sub> B <sub>12</sub> H <sub>12</sub>    | KCN                                                             | KC <sub>2</sub> N <sub>3</sub>                   |
| KC <sub>4</sub> N <sub>3</sub>                  | K <sub>2</sub> CN <sub>2</sub>                    | K <sub>3</sub> C <sub>6</sub> N <sub>9</sub>      | K <sub>3</sub> LiSi <sub>4</sub>                                | K <sub>7</sub> LiSi <sub>8</sub>                 |
| KMgH <sub>3</sub>                               | K <sub>2</sub> MgH <sub>4</sub>                   | KNH <sub>2</sub>                                  | (K(NH <sub>2</sub> ))(NH <sub>3</sub> ) <sub>2</sub>            | KSiH <sub>3</sub>                                |
| LiAlB <sub>14</sub>                             | LiAlH <sub>4</sub>                                | Li <sub>3</sub> AlH <sub>6</sub>                  | LiBC                                                            | LiB <sub>13</sub> C <sub>2</sub>                 |
| Li <sub>2</sub> B <sub>12</sub> C <sub>2</sub>  | LiBH                                              | Li(BH <sub>2</sub> )                              | LiBH <sub>4</sub>                                               | Li <sub>2</sub> B <sub>12</sub> H <sub>12</sub>  |
| Li <sub>3</sub> (BH <sub>6</sub> )              | Li <sub>3</sub> BN <sub>2</sub>                   | Li <sub>2</sub> B <sub>12</sub> Si <sub>2</sub>   | LiCN                                                            | Li <sub>2</sub> CN <sub>2</sub>                  |
| LiMgH <sub>3</sub>                              | LiMgN                                             | Li <sub>2</sub> MgSi                              | Li <sub>12</sub> Mg <sub>3</sub> Si <sub>4</sub>                | LiNH <sub>2</sub>                                |
| Li <sub>2</sub> NH                              | Li <sub>4</sub> NH                                | LiN <sub>3</sub> Si <sub>2</sub>                  | Li <sub>5</sub> N <sub>3</sub> Si                               | Li <sub>7</sub> N <sub>4</sub> V                 |
| LiNa <sub>2</sub> N                             | LiNa <sub>5</sub> N <sub>2</sub>                  | Li <sub>2</sub> Na <sub>4</sub> N <sub>2</sub>    | Li <sub>2</sub> NaN                                             | Li <sub>3</sub> Na <sub>3</sub> N <sub>2</sub>   |
| Li <sub>4</sub> Na <sub>2</sub> N <sub>2</sub>  | Li <sub>5</sub> NaN <sub>2</sub>                  | Li <sub>3</sub> NaSi <sub>6</sub>                 | Li <sub>3</sub> ScN <sub>2</sub>                                | MgAlH <sub>5</sub>                               |
| Mg(AlH <sub>4</sub> ) <sub>2</sub>              | MgAlSi                                            | MgAl <sub>2</sub> Si <sub>2</sub>                 | MgB <sub>2</sub> C <sub>2</sub>                                 | MgB <sub>12</sub> C <sub>2</sub>                 |

|                                                   |                                                                 |                                                                               |                                                                                                                   |                                                                 |
|---------------------------------------------------|-----------------------------------------------------------------|-------------------------------------------------------------------------------|-------------------------------------------------------------------------------------------------------------------|-----------------------------------------------------------------|
| Mg <sub>2</sub> B <sub>24</sub> C                 | Mg(BH <sub>4</sub> ) <sub>2</sub>                               | MgB <sub>12</sub> H <sub>12</sub>                                             | MgB <sub>9</sub> N                                                                                                | Mg <sub>3</sub> BN <sub>3</sub>                                 |
| MgB <sub>12</sub> Si <sub>2</sub>                 | MgC <sub>4</sub> N <sub>6</sub>                                 | Mg(NCN)                                                                       | Mg(NH <sub>2</sub> ) <sub>2</sub>                                                                                 | MgSiN <sub>2</sub>                                              |
| Mg <sub>7</sub> TiH <sub>16</sub>                 | N <sub>2</sub> BH <sub>7</sub>                                  | N <sub>2</sub> B <sub>10</sub> H <sub>18</sub>                                | N <sub>3</sub> B <sub>3</sub> H <sub>6</sub>                                                                      | N <sub>3</sub> B <sub>3</sub> H <sub>12</sub>                   |
| N <sub>4</sub> B <sub>9</sub> H <sub>11</sub>     | N <sub>4</sub> B <sub>10</sub> H <sub>8</sub>                   | N <sub>4</sub> B <sub>10</sub> H <sub>22</sub>                                | NH <sub>3</sub> BH <sub>3</sub>                                                                                   | (NH <sub>4</sub> ) <sub>2</sub> B <sub>12</sub> H <sub>12</sub> |
| (NH <sub>2</sub> )CN                              | NH <sub>4</sub> HCN <sub>2</sub>                                | N(SiH <sub>3</sub> ) <sub>3</sub>                                             | NaAlH <sub>4</sub>                                                                                                | Na <sub>3</sub> AlH <sub>6</sub>                                |
| Na <sub>5</sub> Al <sub>3</sub> H <sub>14</sub>   | NaAlSi                                                          | NaAlSi <sub>4</sub>                                                           | NaBH <sub>4</sub>                                                                                                 | Na <sub>2</sub> (B <sub>10</sub> H <sub>10</sub> )              |
| Na <sub>3</sub> (BN <sub>2</sub> )                | NaCN                                                            | NaC <sub>4</sub> N <sub>3</sub>                                               | Na <sub>2</sub> CN <sub>2</sub>                                                                                   | Na <sub>3</sub> C <sub>6</sub> N <sub>9</sub>                   |
| NaMgH <sub>3</sub>                                | NaN <sub>3</sub> C <sub>2</sub>                                 | NaNH <sub>2</sub>                                                             | ScAl <sub>3</sub> C <sub>3</sub>                                                                                  | Sc <sub>2</sub> AlC                                             |
| Sc <sub>3</sub> AlC                               | ScB <sub>2</sub> C                                              | ScB <sub>2</sub> C <sub>2</sub>                                               | Sc <sub>2</sub> BC <sub>2</sub>                                                                                   | Sc <sub>2</sub> V <sub>3</sub> Si <sub>4</sub>                  |
| SiCN                                              | SiC <sub>2</sub> N <sub>4</sub>                                 | Si <sub>2</sub> CN <sub>4</sub>                                               | Ti <sub>2</sub> AlC                                                                                               | Ti <sub>3</sub> AlC                                             |
| Ti <sub>3</sub> AlC <sub>2</sub>                  | Ti <sub>2</sub> AlN                                             | Ti <sub>3</sub> AlN                                                           | Ti <sub>4</sub> AlN <sub>3</sub>                                                                                  | Ti <sub>6</sub> Si <sub>2</sub> B                               |
| Ti <sub>3</sub> SiC <sub>2</sub>                  | V <sub>12</sub> Al <sub>3</sub> C <sub>8</sub>                  | V <sub>5</sub> SiB <sub>2</sub>                                               |                                                                                                                   |                                                                 |
| <b>Four-element compounds</b>                     |                                                                 |                                                                               |                                                                                                                   |                                                                 |
| AlNC <sub>3</sub> H <sub>10</sub>                 | BCH <sub>5</sub> N <sub>2</sub>                                 | B <sub>10</sub> C <sub>6</sub> H <sub>30</sub> N <sub>2</sub>                 | B <sub>20</sub> C <sub>3</sub> H <sub>30</sub> N <sub>2</sub>                                                     | BC <sub>4</sub> KN <sub>4</sub>                                 |
| CH <sub>3</sub> NH <sub>2</sub> BH <sub>3</sub>   | Ca <sub>2</sub> N <sub>2</sub> BH                               | Ca(NH <sub>2</sub> BH <sub>3</sub> ) <sub>2</sub>                             | KAl(NH <sub>2</sub> ) <sub>4</sub>                                                                                | K <sub>5</sub> C <sub>2</sub> HN <sub>4</sub>                   |
| KCaN <sub>3</sub> H <sub>6</sub>                  | K(HCN <sub>2</sub> )                                            | K <sub>2</sub> LiAlH <sub>6</sub>                                             | KLi <sub>3</sub> (NH <sub>2</sub> ) <sub>4</sub>                                                                  | KLi <sub>7</sub> N <sub>8</sub> H <sub>16</sub>                 |
| K <sub>2</sub> Li(NH <sub>2</sub> ) <sub>3</sub>  | K <sub>2</sub> Mg(NH <sub>2</sub> ) <sub>4</sub>                | K <sub>2</sub> NaAlH <sub>6</sub>                                             | K <sub>2</sub> Na(NH <sub>2</sub> ) <sub>3</sub>                                                                  | K <sub>3</sub> Si <sub>6</sub> N <sub>11</sub> H <sub>6</sub>   |
| LiAlMg <sub>10</sub> H <sub>24</sub>              | LiAl(NH <sub>2</sub> ) <sub>4</sub>                             | Li(B(CN) <sub>4</sub> )                                                       | Li <sub>4</sub> BN <sub>3</sub> H <sub>10</sub>                                                                   | Li <sub>2</sub> Ca(NH) <sub>2</sub>                             |
| LiK(BH <sub>4</sub> ) <sub>2</sub>                | Li <sub>2</sub> Mg(NH) <sub>2</sub>                             | Li(NH <sub>2</sub> BH <sub>3</sub> )                                          | (Li(NH <sub>3</sub> ) <sub>4</sub> ) <sub>2</sub> (B <sub>6</sub> H <sub>6</sub> )(NH <sub>3</sub> ) <sub>2</sub> | LiNa <sub>2</sub> AlH <sub>6</sub>                              |
| LiNa <sub>2</sub> (NH <sub>2</sub> ) <sub>3</sub> | Li <sub>3</sub> Na(NH <sub>2</sub> ) <sub>4</sub>               | LiSc(BH <sub>4</sub> ) <sub>4</sub>                                           | Mg(BH <sub>4</sub> ) <sub>2</sub> (NH <sub>3</sub> ) <sub>2</sub>                                                 | (NH <sub>4</sub> )B(CN) <sub>4</sub>                            |
| NaAl(NH <sub>2</sub> ) <sub>4</sub>               | NaB(CN) <sub>4</sub>                                            | NaN <sub>2</sub> CH                                                           | Si <sub>2</sub> C <sub>7</sub> H <sub>18</sub> N <sub>2</sub>                                                     | VC <sub>8</sub> H <sub>24</sub> N <sub>4</sub>                  |
| <b>Five-element compounds</b>                     |                                                                 |                                                                               |                                                                                                                   |                                                                 |
| LiAlC <sub>4</sub> H <sub>16</sub> N <sub>4</sub> | LiSi <sub>3</sub> C <sub>9</sub> H <sub>27</sub> N <sub>2</sub> | Si <sub>2</sub> B <sub>2</sub> C <sub>12</sub> H <sub>37</sub> N <sub>5</sub> |                                                                                                                   |                                                                 |

**Table S2.** Comparison of the experimental and the DFT calculated structural parameters for the 147 compounds listed in Table 1, with all distances in Å and angles in degrees.

| Compound                                        | Space group                      | Structural parameters (Å, degree)                                              |                                                                                |
|-------------------------------------------------|----------------------------------|--------------------------------------------------------------------------------|--------------------------------------------------------------------------------|
|                                                 |                                  | Experimental                                                                   | Calculated                                                                     |
| AlB <sub>12</sub>                               | P4 <sub>1</sub> 2 <sub>1</sub> 2 | <i>a</i> = 10.17<br><i>c</i> = 14.28                                           | <i>a</i> = 11.41<br><i>c</i> = 13.86                                           |
| Al <sub>4</sub> C <sub>3</sub>                  | R-3mH                            | <i>a</i> = 3.335<br><i>c</i> = 24.967<br>$\gamma$ = 120.0                      | <i>a</i> = 3.349<br><i>c</i> = 25.109<br>$\gamma$ = 120.0                      |
| Al <sub>4</sub> Ca                              | I4/mmm                           | <i>a</i> = 4.354<br><i>c</i> = 11.18                                           | <i>a</i> = 4.368<br><i>c</i> = 11.19                                           |
| Al <sub>14</sub> Mg <sub>13</sub>               | Im-3m                            | <i>a</i> = 10.44                                                               | <i>a</i> = 10.2                                                                |
| Al <sub>30</sub> Mg <sub>23</sub>               | R-3H                             | <i>a</i> = 12.825                                                              | <i>a</i> = 12.787                                                              |
| Al <sub>23</sub> V <sub>4</sub>                 | P63/mmc                          | <i>a</i> = 7.693<br><i>c</i> = 17.04<br>$\gamma$ = 120                         | <i>a</i> = 7.681<br><i>c</i> = 17.04<br>$\gamma$ = 120                         |
| Al <sub>45</sub> V <sub>7</sub>                 | C2/m                             | <i>a</i> = 25.604<br><i>b</i> = 7.621<br><i>c</i> = 11.081<br>$\beta$ = 128.92 | <i>a</i> = 25.655<br><i>b</i> = 7.608<br><i>c</i> = 11.086<br>$\beta$ = 128.88 |
| B <sub>4</sub> C                                | R-3mH                            | <i>a</i> = 5.60<br><i>c</i> = 12.12<br>$\gamma$ = 120                          | <i>a</i> = 7.40<br><i>c</i> = 8.77<br>$\gamma$ = 120                           |
| B <sub>13</sub> C <sub>2</sub>                  | R-3mH                            | <i>a</i> = 5.633<br><i>c</i> = 12.164<br>$\gamma$ = 120                        | <i>a</i> = 5.656<br><i>c</i> = 12.12<br>$\gamma$ = 120                         |
| (B <sub>10</sub> H <sub>13</sub> ) <sub>2</sub> | Pbca                             | <i>a</i> = 10.66<br><i>b</i> = 10.55<br><i>c</i> = 14.56                       | <i>a</i> = 10.83<br><i>b</i> = 10.69<br><i>c</i> = 14.78                       |
| B <sub>13</sub> N <sub>2</sub>                  | R-3m                             | <i>a</i> = 5.45<br><i>c</i> = 12.26                                            | <i>a</i> = 5.49<br><i>c</i> = 12.41                                            |
| C <sub>2</sub> Ca                               | C2/m                             | <i>a</i> = 7.208<br><i>b</i> = 3.828<br><i>c</i> = 7.368<br>$\beta$ = 107.193  | <i>a</i> = 7.170<br><i>b</i> = 3.833<br><i>c</i> = 7.416<br>$\beta$ = 106.961  |
| C <sub>2</sub> N <sub>2</sub>                   | Pcab                             | <i>a</i> = 6.31<br><i>b</i> = 7.08<br><i>c</i> = 6.19                          | <i>a</i> = 6.72<br><i>b</i> = 6.38<br><i>c</i> = 6.06                          |

|               |        |                                                                |                                                               |
|---------------|--------|----------------------------------------------------------------|---------------------------------------------------------------|
| $C_3N_4$      | P-6m2  | $a = 4.742$<br>$c = 6.720$<br>$\gamma = 120$                   | $a = 4.766$<br>$c = 6.400$<br>$\gamma = 120$                  |
| $C_5N_4$      | R3cH   | $a = 9.062$<br>$c = 11.625$<br>$\gamma = 120$                  | $a = 8.912$<br>$c = 11.416$<br>$\gamma = 120$                 |
| $C_{12}N_6$   | Pa-3   | $a = 10.781$                                                   | $a = 10.746$                                                  |
| $CaB_4$       | P4/mbm | $a = 7.10$<br>$c = 4.14$                                       | $a = 7.17$<br>$c = 4.1$                                       |
| $Ca_2Si$      | Pnma   | $a = 7.69$<br>$b = 4.82$<br>$c = 9.05$                         | $a = 7.65$<br>$b = 4.83$<br>$c = 9.09$                        |
| $KC_8$        | Fddd   | $a = 4.92$<br>$b = 8.51$<br>$c = 21.40$                        | $a = 4.97$<br>$b = 8.61$<br>$c = 21.37$                       |
| $KSi$         | P-43n  | $a = 12.62$                                                    | $a = 12.72$                                                   |
| $K_8Si_{46}$  | Pm-3n  | $a = 10.30$                                                    | $a = 10.36$                                                   |
| $LiB$         | PNMA   | $a = 6.40$<br>$b = 3.00$<br>$c = 5.6$                          | $a = 6.225$<br>$b = 3.073$<br>$c = 5.589$                     |
| $LiMg$        | Im-3m  | $a = 3.484$                                                    | $a = 3.434$                                                   |
| $Li_{12}Si_7$ | Pnma   | $a = 8.6$<br>$b = 19.755$<br>$c = 14.336$                      | $a = 8.54$<br>$b = 19.631$<br>$c = 14.32$                     |
| $Li_{13}Si_4$ | Pbam   | $a = 7.99$<br>$b = 15.21$<br>$c = 4.43$                        | $a = 7.902$<br>$b = 15.022$<br>$c = 4.432$                    |
| $Li_{15}Si_4$ | I-43d  | $a = 10.69$                                                    | $a = 10.6$                                                    |
| $NaB_{15}$    | Imam   | $a = 5.847$<br>$b = 8.415$<br>$c = 10.298$                     | $a = 5.848$<br>$b = 8.426$<br>$c = 10.295$                    |
| $Na_3B_{20}$  | Cmmm   | $a = 18.695$<br>$b = 5.701$<br>$c = 4.151$                     | $a = 18.636$<br>$b = 5.693$<br>$c = 4.158$                    |
| $Na_4Si_4$    | C2/c   | $a = 12.153$<br>$b = 6.545$<br>$c = 11.132$<br>$\beta = 118.9$ | $a = 12.151$<br>$b = 6.563$<br>$c = 11.109$<br>$\beta = 90.0$ |

|                                        |                     |                                                                                                        |                                                                                                         |
|----------------------------------------|---------------------|--------------------------------------------------------------------------------------------------------|---------------------------------------------------------------------------------------------------------|
| $\text{Na}_8\text{Si}_{46}$            | Pm-3n               | $a = 10.19$                                                                                            | $a = 12.31$                                                                                             |
| $\text{Sc}_{15}\text{C}_{19}$          | P-42 <sub>1</sub> c | $a = 7.5$<br>$c = 15.0$                                                                                | $a = 7.51$<br>$c = 14.612$                                                                              |
| $\text{SiB}_3$                         | Imma                | $a = 8.392$<br>$b = 12.568$<br>$c = 6.213$                                                             | $a = 8.381$<br>$b = 12.588$<br>$c = 6.223$                                                              |
| $\text{SiC}$                           | F-43m               | $a = 4.36$                                                                                             | $a = 4.38$                                                                                              |
| $\text{TiV}$                           | Im-3m               | $a = 3.159$                                                                                            | $a = 3.103$                                                                                             |
| $\text{V}_2\text{N}$                   | P-31m               | $a = 4.917$<br>$c = 4.568$<br>$\gamma = 120.0$                                                         | $a = 4.899$<br>$c = 4.522$<br>$\gamma = 120.0$                                                          |
| $\text{V}_5\text{Si}_3$                | I4/mcm              | $a = 9.429$<br>$c = 4.756$                                                                             | $a = 9.393$<br>$c = 4.715$                                                                              |
| $\text{Al}(\text{BH}_4)_3$             | Pna2 <sub>1</sub>   | $a = 18.02$<br>$b = 6.14$<br>$c = 6.20$                                                                | $a = 17.99$<br>$b = 6.12$<br>$c = 6.20$                                                                 |
| $\text{Al}_2\text{MgC}_2$              | P-3m                | $a = 3.377$<br>$c = 5.817$<br>$\gamma = 120.0$                                                         | $a = 3.385$<br>$c = 5.82$<br>$\gamma = 120.0$                                                           |
| $\text{Al}_{18}\text{Mg}_3\text{Ti}_2$ | Fd-3ms              | $a = 14.788$                                                                                           | $a = 14.775$                                                                                            |
| $\text{BC}_2\text{N}$                  | Pmm2                | $a = 2.528$<br>$b = 2.502$<br>$c = 3.587$                                                              | $a = 2.56$<br>$b = 2.533$<br>$c = 3.637$                                                                |
| $\text{C}_2\text{H}_4\text{N}_4$       | P21/c               | $a = 3.791$<br>$b = 12.412$<br>$c = 9.113$<br>$\beta = 91.49$                                          | $a = 3.651$<br>$b = 12.012$<br>$c = 9.189$<br>$\beta = 91.32$                                           |
| $\text{C}_2\text{H}_{18}\text{N}_{18}$ | P-1                 | $a = 4.621$<br>$b = 8.585$<br>$c = 9.271$<br>$\alpha = 108.49$<br>$\beta = 95.29$<br>$\gamma = 102.99$ | $a = 4.501$<br>$b = 8.415$<br>$c = 9.174$<br>$\alpha = 109.353$<br>$\beta = 95.17$<br>$\gamma = 103.09$ |
| $\text{C}_2\text{N}_2(\text{NH})$      | Cmc2 <sub>1</sub>   | $a = 7.57$<br>$b = 4.44$<br>$c = 4.0$                                                                  | $a = 7.63$<br>$b = 4.48$<br>$c = 4.04$                                                                  |
| $\text{Ca}_4\text{Al}_3\text{Mg}$      | Pbcm                | $a = 6.179$<br>$b = 24.211$                                                                            | $a = 6.191$<br>$b = 24.248$                                                                             |

|                                                                 |                    |                                                                                                   |                                                                                                   |
|-----------------------------------------------------------------|--------------------|---------------------------------------------------------------------------------------------------|---------------------------------------------------------------------------------------------------|
|                                                                 |                    | $c = 5.886$                                                                                       | $c = 5.905$                                                                                       |
| CaAlSi                                                          | P-6m2              | $a = 4.2$<br>$c = 4.4$                                                                            | $a = 4.21$<br>$c = 4.41$                                                                          |
| Ca(BH <sub>4</sub> ) <sub>2</sub>                               | F2dd               | $a = 8.78$<br>$b = 13.02$<br>$c = 7.41$                                                           | $a = 8.75$<br>$b = 12.94$<br>$c = 7.37$                                                           |
| CaB <sub>12</sub> H <sub>12</sub>                               | C2/c               | $a = 14.328$<br>$b = 7.164$<br>$c = 11.017$<br>$\alpha = \beta = 89.84$<br>$\gamma = 122.07$      | $a = 14.307$<br>$b = 7.152$<br>$c = 11.001$<br>$\alpha = \beta = 89.85$<br>$\gamma = 122.07$      |
| CaC <sub>4</sub> N <sub>6</sub>                                 | C2/c               | $a = 12.446$<br>$b = 6.08$<br>$c = 7.898$<br>$\beta = 145.2$                                      | $a = 12.855$<br>$b = 6.261$<br>$c = 7.674$<br>$\beta = 149.86$                                    |
| Ca <sub>4</sub> N <sub>2</sub> (CN <sub>2</sub> )               | Pnma               | $a = 11.44$<br>$b = 3.58$<br>$c = 13.84$                                                          | $a = 11.51$<br>$b = 3.58$<br>$c = 13.92$                                                          |
| Ca <sub>11</sub> N <sub>6</sub> (CN <sub>2</sub> ) <sub>2</sub> | P42/MNM            | $a = 14.523$<br>$c = 3.608$                                                                       | $a = 14.551$<br>$c = 3.6221$                                                                      |
| CaSiN <sub>2</sub>                                              | Pbca               | $a = 5.123$<br>$b = 10.207$<br>$c = 14.823$                                                       | $a = 5.163$<br>$b = 10.279$<br>$c = 14.933$                                                       |
| Ca <sub>2</sub> Si <sub>5</sub> N <sub>8</sub>                  | Pbca               | $a = 10.584$<br>$b = 9.652$<br>$c = 13.663$                                                       | $a = 10.616$<br>$b = 9.675$<br>$c = 13.669$                                                       |
| Ca <sub>5</sub> (Si <sub>2</sub> N <sub>6</sub> )               | C12/C1             | $a = 9.836$<br>$b = 6.0519$<br>$c = 12.757$<br>$\beta = 100.20$                                   | $a = 9.899$<br>$b = 6.094$<br>$c = 14.736$<br>$\beta = 121.155$                                   |
| Ca <sub>4</sub> TiN <sub>4</sub>                                | P-1                | $a = 5.98$<br>$b = 6.01$<br>$c = 8.99$<br>$\alpha = 71.57$<br>$\beta = 79.47$<br>$\gamma = 68.26$ | $a = 6.01$<br>$b = 6.04$<br>$c = 9.02$<br>$\alpha = 71.62$<br>$\beta = 79.32$<br>$\gamma = 68.07$ |
| H <sub>9</sub> CN <sub>9</sub>                                  | P2 <sub>1</sub> /c | $a = 6.679$<br>$b = 7.722$                                                                        | $a = 6.555$<br>$b = 7.546$                                                                        |

|                                          |                          |                                                                                                 |                                                                                                    |
|------------------------------------------|--------------------------|-------------------------------------------------------------------------------------------------|----------------------------------------------------------------------------------------------------|
|                                          |                          | $c = 13.143$<br>$\beta = 95.44$                                                                 | $c = 12.901$<br>$\beta = 95.71$                                                                    |
| $\text{KBH}_4$                           | Fm-3m                    | $a = 6.71$                                                                                      | $a = 6.69$                                                                                         |
| $\text{KBH}_4$                           | $\text{P4}_2/\text{nmc}$ | $a = 4.68$<br>$c = 6.57$                                                                        | $a = 4.71$<br>$c = 6.61$                                                                           |
| $\text{KB}_{21}\text{H}_{18}$            | C2                       | $a = 12.49$<br>$b = 7.11$<br>$c = 16.94$<br>$\beta = 93.81$                                     | $a = 12.71$<br>$b = 7.22$<br>$c = 17.04$<br>$\beta = 94.1$                                         |
| $\text{K}_2\text{B}_6\text{H}_6$         | Fm-3m                    | $a = 8.839$                                                                                     | $a = 8.897$                                                                                        |
| $\text{K}_2(\text{B}_{10}\text{H}_{10})$ | $\text{P121}/\text{n1}$  | $a = 12.855$<br>$b = 11.178$<br>$c = 6.823$<br>$\beta = 93.357$                                 | $a = 11.993$<br>$b = 9.748$<br>$c = 9.028$<br>$\beta = 91.93$                                      |
| $\text{K}_2\text{B}_{12}\text{H}_{12}$   | Fm-3                     | $a = 10.629$                                                                                    | $a = 10.639$                                                                                       |
| $\text{KC}_4\text{N}_3$                  | P-1                      | $a = 8.665$<br>$b = 8.873$<br>$c = 3.89$<br>$\alpha = 86.7$<br>$\beta = 90.1$<br>$\gamma = 105$ | $a = 8.827$<br>$b = 9.296$<br>$c = 4.009$<br>$\alpha = 83.8$<br>$\beta = 90.9$<br>$\gamma = 104.3$ |
| $\text{KNH}_2$                           | $\text{P2}_1/\text{m}$   | $a = 4.586$<br>$b = 3.904$<br>$c = 6.223$<br>$\beta = 95.8$                                     | $a = 4.458$<br>$b = 3.745$<br>$c = 6.111$<br>$\beta = 94.958$                                      |
| $(\text{K}(\text{NH}_2))(\text{NH}_3)_2$ | $\text{C222}_1$          | $a = 6.839$<br>$b = 9.953$<br>$c = 6.590$                                                       | $a = 6.834$<br>$b = 9.681$<br>$c = 6.5711$                                                         |
| $\text{LiAlB}_{14}$                      | Imam                     | $a = 5.847$<br>$b = 8.143$<br>$c = 10.354$                                                      | $a = 5.852$<br>$b = 8.142$<br>$c = 10.353$                                                         |
| $\text{LiB}_{13}\text{C}_2$              | Imma                     | $a = 5.668$<br>$b = 10.820$<br>$c = 8.040$                                                      | $a = 5.842$<br>$b = 9.661$<br>$c = 8.923$                                                          |
| $\text{Li}_2\text{B}_{12}\text{C}_2$     | AMM2                     | $a = 4.706$<br>$b = 5.318$<br>$c = 5.318$<br>$\alpha = 115.798$                                 | $a = 4.663$<br>$b = 5.553$<br>$c = 5.553$<br>$\alpha = 100.47$                                     |



|                                                 |                   |                                                              |                                                              |
|-------------------------------------------------|-------------------|--------------------------------------------------------------|--------------------------------------------------------------|
| LiBH                                            | PNMA              | $a = 6.2$<br>$b = 3.0$<br>$c = 6.3$                          | $a = 5.646$<br>$b = 3.076$<br>$c = 6.505$                    |
| Li(BH <sub>2</sub> )                            | PNMA              | $a = 8.1$<br>$b = 3.0$<br>$c = 5.9$                          | $a = 8.322$<br>$b = 3.037$<br>$c = 5.485$                    |
| Li <sub>2</sub> B <sub>12</sub> H <sub>12</sub> | Pa3               | $a = 9.577$                                                  | $a = 9.580$                                                  |
| Li <sub>3</sub> (BH <sub>6</sub> )              | R3-H              | $a = 5.182$<br>$\alpha = \beta = \gamma = 91.11$             | $a = 5.356$<br>$\alpha = \beta = \gamma = 94.16$             |
| Li <sub>2</sub> B <sub>12</sub> Si <sub>2</sub> | Cmce              | $a = 6.106$<br>$b = 10.979$<br>$c = 8.405$                   | $a = 6.118$<br>$b = 11.012$<br>$c = 8.43$                    |
| LiMgH <sub>3</sub>                              | R3c               | $a = 4.96$<br>$c = 13.34$                                    | $a = 4.94$<br>$c = 13.24$                                    |
| Li <sub>2</sub> MgSi                            | Fm-3m             | $a = 12.83$                                                  | $a = 12.748$                                                 |
| LiN <sub>3</sub> Si <sub>2</sub>                | Cmc2 <sub>1</sub> | $a = 9.222$<br>$b = 5.296$<br>$c = 4.78$                     | $a = 9.277$<br>$b = 5.329$<br>$c = 4.812$                    |
| LiNa <sub>2</sub> N                             | P6/mmm            | $a = 4$<br>$c = 4.2$<br>$\gamma = 120$                       | $a = 4.37$<br>$c = 3.838$<br>$\gamma = 120$                  |
| LiNa <sub>5</sub> N <sub>2</sub>                | C <sub>2</sub>    | $a = 6.731$<br>$b = 5.944$<br>$c = 6.383$<br>$\beta = 91.18$ | $a = 6.735$<br>$b = 5.949$<br>$c = 6.389$<br>$\beta = 91.15$ |
| Li <sub>2</sub> Na <sub>4</sub> N <sub>2</sub>  | P4/nmm            | $a = 3.895$<br>$c = 6.114$                                   | $a = 4.066$<br>$c = 6.099$                                   |
| Li <sub>2</sub> NaN                             | P6/nmm            | $a = 3.65$<br>$c = 4.6$<br>$\gamma = 120$                    | $a = 3.62$<br>$c = 4.716$<br>$\gamma = 120$                  |
| Li <sub>3</sub> Na <sub>3</sub> N <sub>2</sub>  | Pm                | $a = 3.854$<br>$b = 3.676$<br>$c = 6.32$<br>$\beta = 90.31$  | $a = 3.853$<br>$b = 4.208$<br>$c = 7.272$<br>$\beta = 89.85$ |
| Li <sub>4</sub> Na <sub>2</sub> N <sub>2</sub>  | Fm-3m             | $a = 5.265$                                                  | $a = 5.404$                                                  |
| Li <sub>5</sub> NaN <sub>2</sub>                | P4/mmm            | $a = 3.965$<br>$c = 5.504$                                   | $a = 3.705$<br>$c = 5.186$                                   |
| Li <sub>3</sub> NaSi <sub>6</sub>               | Pnma              | $a = 17.972$                                                 | $a = 18.021$                                                 |

|                                        |                                  |                                                                |                                                               |
|----------------------------------------|----------------------------------|----------------------------------------------------------------|---------------------------------------------------------------|
|                                        |                                  | $b = 3.788$<br>$c = 10.299$                                    | $b = 3.804$<br>$c = 10.331$                                   |
| $\text{MgAl}_2\text{Si}_2$             | P-3m1                            | $a = 4.05$<br>$c = 6.74$                                       | $a = 4.08$<br>$c = 6.69$                                      |
| $\text{MgB}_{12}\text{C}_2$            | C2/c                             | $a = 7.27$<br>$b = 8.78$<br>$c = 7.28$<br>$\beta = 105.33$     | $a = 7.26$<br>$b = 8.77$<br>$c = 7.25$<br>$\beta = 105.32$    |
| $\text{Mg}_2\text{B}_{24}\text{C}$     | P-4n2                            | $a = 8.94$<br>$c = 5.07$                                       | $a = 8.96$<br>$c = 5.09$                                      |
| $\text{MgB}_{12}\text{H}_{12}$         | C2/m                             | $a = 11.689$<br>$b = 8.712$<br>$c = 6.907$<br>$\beta = 122.47$ | $a = 11.687$<br>$b = 8.711$<br>$c = 6.905$<br>$\beta = 122.5$ |
| $\text{MgB}_{12}\text{Si}_2$           | Pnma                             | $a = 10.98$<br>$b = 6.11$<br>$c = 8.36$                        | $a = 11.03$<br>$b = 6.13$<br>$c = 8.39$                       |
| $\text{MgC}_4\text{N}_6$               | Pnnm                             | $a = 6.171$<br>$b = 7.17$<br>$c = 7.404$                       | $a = 6.443$<br>$b = 7.289$<br>$c = 7.429$                     |
| $\text{Mg}_7\text{TiH}_{16}$           | Fm3m                             | $a = 9.564$                                                    | $a = 9.341$                                                   |
| $\text{N}_2\text{BH}_7$                | Pbcn                             | $a = 9.53$<br>$b = 5.12$<br>$c = 13.01$                        | $a = 9.768$<br>$b = 5.237$<br>$c = 12.672$                    |
| $\text{N}_2\text{B}_{10}\text{H}_{18}$ | Pnma                             | $a = 18.096$<br>$b = 7.373$<br>$c = 7.223$                     | $a = 18.237$<br>$b = 7.528$<br>$c = 7.284$                    |
| $\text{N}_3\text{B}_3\text{H}_6$       | P4 <sub>3</sub> 2 <sub>1</sub> 2 | $a = 5.428$<br>$c = 16.279$                                    | $a = 5.63$<br>$c = 17.223$                                    |
| $\text{N}_3\text{B}_3\text{H}_{12}$    | Pbcm                             | $a = 4.403$<br>$b = 12.21$<br>$c = 11.227$                     | $a = 4.442$<br>$b = 12.382$<br>$c = 11.272$                   |
| $\text{N}_4\text{B}_9\text{H}_{11}$    | P2 <sub>1</sub> /c               | $a = 8.318$<br>$b = 5.951$<br>$c = 19.265$<br>$\beta = 95.3$   | $a = 8.611$<br>$b = 6.263$<br>$c = 20.044$<br>$\beta = 94.6$  |
| $\text{N}_4\text{B}_{10}\text{H}_8$    | C2/c                             | $a = 11.411$<br>$b = 6.658$                                    | $a = 11.945$<br>$b = 7.373$                                   |

|                        |            |                                                                                                     |                                                                                                     |
|------------------------|------------|-----------------------------------------------------------------------------------------------------|-----------------------------------------------------------------------------------------------------|
|                        |            | $c = 13.058$                                                                                        | $c = 15.268$<br>$\alpha = 91.09$                                                                    |
| $N_4B_{10}H_{22}$      | $C2/c$     | $a = 7.7$<br>$b = 7.7$<br>$c = 9.772$<br>$\alpha = 83.872$<br>$\beta = 83.872$<br>$\gamma = 82.307$ | $a = 7.813$<br>$b = 7.229$<br>$c = 9.473$<br>$\alpha = 77.29$<br>$\beta = 76.99$<br>$\gamma = 82.3$ |
| $NH_3BH_3$             | $Pmn21$    | $a = 5.395$<br>$b = 4.887$<br>$c = 4.986$                                                           | $a = 5.356$<br>$b = 4.796$<br>$c = 4.921$                                                           |
| $(NH_4)_2B_{12}H_{12}$ | $Fm-3$     | $a = 10.88$                                                                                         | $a = 10.79$                                                                                         |
| $(NH_2)CN$             | $Pbca$     | $a = 6.856$<br>$b = 6.628$<br>$c = 9.147$                                                           | $a = 6.726$<br>$b = 6.597$<br>$c = 8.916$                                                           |
| $NH_4HCN_2$            | $P2_12_12$ | $a = 6.44$<br>$b = 6.58$<br>$c = 7.4$                                                               | $a = 6.38$<br>$b = 6.5$<br>$c = 7.3$                                                                |
| $Na_5Al_3H_{14}$       | $P4/mnc$   | $a = 6.769$<br>$c = 10.289$                                                                         | $a = 6.7$<br>$c = 10.2$                                                                             |
| $NaBH_4$               | $Fm-3m$    | $a = 6.15$                                                                                          | $a = 6.02$                                                                                          |
| $NaBH_4$               | $P-42_1c$  | $a = 4.35$<br>$c = 5.86$                                                                            | $a = 4.31$<br>$c = 5.82$                                                                            |
| $Na_2(B_{10}H_{10})$   | $P121/n1$  | $a = 10.283$<br>$b = 13.022$<br>$c = 6.673$<br>$\beta = 93.754$                                     | $a = 9.846$<br>$b = 12.153$<br>$c = 8.104$<br>$\beta = 93.074$                                      |
| $Na_3(BN_2)$           | $P2_1/c$   | $a = 5.717$<br>$b = 7.931$<br>$c = 7.883$<br>$\beta = 111.32$                                       | $a = 5.737$<br>$b = 7.966$<br>$c = 7.9$<br>$\beta = 111.29$                                         |
| $Na_3C_6N_9$           | $P2_1/c$   | $a = 11.048$<br>$b = 23.381$<br>$c = 3.516$<br>$\beta = 97.913$                                     | $a = 11.397$<br>$b = 24.101$<br>$c = 3.937$<br>$\beta = 97.913$                                     |
| $Sc_2AlC$              | $P63/MMC$  | $a = 3.228$<br>$c = 14.873$<br>$\gamma = 120.0$                                                     | $a = 3.285$<br>$c = 15.043$<br>$\gamma = 120.0$                                                     |

|                                                  |                          |                                                                 |                                                                 |
|--------------------------------------------------|--------------------------|-----------------------------------------------------------------|-----------------------------------------------------------------|
| $\text{Ti}_2\text{AlC}$                          | $\text{P6}_3/\text{mmc}$ | $a = 2.97$<br>$c = 13.22$                                       | $a = 3.07$<br>$c = 13.71$                                       |
| $\text{Ti}_6\text{Si}_2\text{B}$                 | $\text{P-62m}$           | $a = 6.802$<br>$c = 3.338$<br>$\gamma = 120$                    | $a = 6.777$<br>$c = 3.312$<br>$\gamma = 120$                    |
| $\text{V}_{12}\text{Al}_3\text{C}_8$             | $\text{P6}_3/\text{MCM}$ | $a = 5.088$<br>$c = 22.983$<br>$\gamma = 120$                   | $a = 5.065$<br>$c = 22.638$<br>$\gamma = 120$                   |
| $\text{V}_5\text{SiB}_2$                         | $\text{I4/mcm}$          | $a = 5.81$<br>$c = 10.79$                                       | $a = 5.774$<br>$c = 10.762$                                     |
| $\text{AlNC}_3\text{H}_{10}$                     | $\text{P2}_1/\text{c}$   | $a = 5.428$<br>$b = 9.908$<br>$c = 9.963$<br>$\beta = 99.254$   | $a = 5.379$<br>$b = 11.302$<br>$c = 10.271$<br>$\beta = 99.2$   |
| $\text{BCH}_5\text{N}_2$                         | $\text{Pna2}_1$          | $a = 7.973$<br>$b = 6.445$<br>$c = 6.976$                       | $a = 7.986$<br>$b = 6.515$<br>$c = 7.103$                       |
| $\text{B}_{10}\text{C}_6\text{H}_{30}\text{N}_2$ | $\text{P2}_1/\text{c}$   | $a = 8.369$<br>$b = 16.663$<br>$c = 11.989$<br>$\beta = 100.34$ | $a = 8.586$<br>$b = 17.002$<br>$c = 12.249$<br>$\beta = 100.67$ |
| $\text{B}_{20}\text{C}_3\text{H}_{30}\text{N}_2$ | $\text{P2}_12_12_1$      | $a = 10.334$<br>$b = 10.873$<br>$c = 17.524$                    | $a = 10.449$<br>$b = 11.199$<br>$c = 17.78$                     |
| $\text{BC}_4\text{KN}_4$                         | $\text{I4}_1/\text{a}$   | $a = 6.976$<br>$c = 14.21$                                      | $a = 7.151$<br>$c = 14.563$                                     |
| $\text{CH}_3\text{NH}_2\text{BH}_3$              | $\text{Pnma}$            | $a = 11.10$<br>$b = 6.58$<br>$c = 4.92$                         | $a = 11.07$<br>$b = 6.35$<br>$c = 4.88$                         |
| $\text{Ca}(\text{NH}_2\text{BH}_3)_2$            | $\text{C121}$            | $a = 9.10$<br>$b = 4.37$<br>$c = 6.44$<br>$\beta = 93.19$       | $a = 9.12$<br>$b = 4.29$<br>$c = 6.34$<br>$\beta = 93.1$        |
| $\text{KAl}(\text{NH}_2)_4$                      | $\text{C222}_1$          | $a = 10$<br>$b = 5.8$<br>$c = 10.14$                            | $a = 10.2$<br>$b = 5.82$<br>$c = 10.142$                        |
| $\text{K}_5\text{C}_2\text{HN}_4$                | $\text{P4/ncc}$          | $a = 9.095$<br>$c = 11.029$                                     | $a = 9.225$<br>$c = 11.202$                                     |

|                                                               |                                               |                                                                              |                                                                               |
|---------------------------------------------------------------|-----------------------------------------------|------------------------------------------------------------------------------|-------------------------------------------------------------------------------|
| KCaN <sub>3</sub> H <sub>6</sub>                              | P2 <sub>1</sub> /c                            | <i>a</i> = 6.767<br><i>b</i> = 11.68<br><i>c</i> = 6.624<br>$\beta$ = 106.7  | <i>a</i> = 6.797<br><i>b</i> = 11.834<br><i>c</i> = 6.797<br>$\beta$ = 106.82 |
| K(HCN <sub>2</sub> )                                          | P2 <sub>1</sub> 2 <sub>1</sub> 2 <sub>1</sub> | <i>a</i> = 7.087<br><i>b</i> = 9.09<br><i>c</i> = 9.014                      | <i>a</i> = 7.229<br><i>b</i> = 9.172<br><i>c</i> = 9.158                      |
| K <sub>2</sub> LiAlH <sub>6</sub>                             | R-3m                                          | <i>a</i> = 5.62<br><i>c</i> = 27.4                                           | <i>a</i> = 5.62<br><i>c</i> = 27.31                                           |
| KLi <sub>3</sub> (NH <sub>2</sub> ) <sub>4</sub>              | I4 <sub>1</sub> /amd                          | <i>a</i> = 7.238<br><i>c</i> = 23.956                                        | <i>a</i> = 8.208<br><i>c</i> = 23.699                                         |
| KLi <sub>7</sub> N <sub>8</sub> H <sub>16</sub>               | I4 <sub>1</sub> /a                            | <i>a</i> = 7.18<br><i>c</i> = 44.39                                          | <i>a</i> = 7.678<br><i>c</i> = 46.545                                         |
| K <sub>2</sub> Li(NH <sub>2</sub> ) <sub>3</sub>              | P42/m                                         | <i>a</i> = 6.872<br><i>c</i> = 11.706                                        | <i>a</i> = 6.866<br><i>c</i> = 11.726                                         |
| K <sub>2</sub> Mg(NH <sub>2</sub> ) <sub>4</sub>              | P2 <sub>1</sub> /c                            | <i>a</i> = 7.455<br><i>b</i> = 7.024<br><i>c</i> = 13.545<br>$\beta$ = 105.6 | <i>a</i> = 7.255<br><i>b</i> = 7.255<br><i>c</i> = 13.626<br>$\beta$ = 105.25 |
| K <sub>2</sub> NaAlH <sub>6</sub>                             | P2 <sub>1</sub> /c                            | <i>a</i> = 5.733<br><i>b</i> = 5.754<br><i>c</i> = 8.128<br>$\beta$ = 89.97  | <i>a</i> = 5.743<br><i>b</i> = 5.7492<br><i>c</i> = 8.0934<br>$\beta$ = 89.99 |
| K <sub>2</sub> Na(NH <sub>2</sub> ) <sub>3</sub>              | P42/m                                         | <i>a</i> = 7.351<br><i>c</i> = 13.129                                        | <i>a</i> = 7.514<br><i>c</i> = 13.314                                         |
| K <sub>3</sub> Si <sub>6</sub> N <sub>11</sub> H <sub>6</sub> | P4 <sub>3</sub> 32                            | <i>a</i> = 10.789                                                            | <i>a</i> = 10.797                                                             |
| LiAlMg <sub>10</sub> H <sub>24</sub>                          | P121                                          | <i>a</i> = 8.989<br><i>b</i> = 8.985<br><i>c</i> = 4.485<br>$\beta$ = 89.655 | <i>a</i> = 8.915<br><i>b</i> = 8.942<br><i>c</i> = 4.449<br>$\beta$ = 89.65   |
| Li(B(CN) <sub>4</sub> )                                       | P43m                                          | <i>a</i> = 7.849<br>$\alpha = \beta = \gamma = 60.0$                         | <i>a</i> = 7.7822<br>$\alpha = \beta = \gamma = 60.0$                         |
| Li <sub>2</sub> Ca(NH) <sub>2</sub>                           | P-3m1                                         | <i>a</i> = 3.57<br><i>c</i> = 5.95                                           | <i>a</i> = 3.58<br><i>c</i> = 5.84                                            |
| LiK(BH <sub>4</sub> ) <sub>2</sub>                            | Pnma                                          | <i>a</i> = 7.91<br><i>b</i> = 4.49<br><i>c</i> = 13.84                       | <i>a</i> = 7.78<br><i>b</i> = 4.43<br><i>c</i> = 13.72                        |
| Li(NH <sub>2</sub> BH <sub>3</sub> )                          | Pbca                                          | <i>a</i> = 7.11                                                              | <i>a</i> = 6.92                                                               |

|                                                                     |                    |                                                                                                          |                                                                                                       |
|---------------------------------------------------------------------|--------------------|----------------------------------------------------------------------------------------------------------|-------------------------------------------------------------------------------------------------------|
|                                                                     |                    | $b = 13.93$<br>$c = 5.15$                                                                                | $b = 13.52$<br>$c = 5.07$                                                                             |
| $(\text{Li}(\text{NH}_3)_4)_2(\text{B}_6\text{H}_6)(\text{NH}_3)_2$ | P21/c              | $a = 7.483$<br>$b = 11.871$<br>$c = 10.605$<br>$\beta = 95.371$                                          | $a = 7.397$<br>$b = 11.649$<br>$c = 10.449$<br>$\beta = 95.21$                                        |
| $\text{LiNa}_2\text{AlH}_6$                                         | P21/c              | $a = 5.165$<br>$b = 5.251$<br>$c = 7.339$                                                                | $a = 4.777$<br>$b = 4.715$<br>$c = 6.613$                                                             |
| $\text{LiNa}_2(\text{NH}_2)_3$                                      | P4 <sub>2</sub> /m | $a = 6.28$<br>$c = 11.15$                                                                                | $a = 6.17$<br>$c = 10.90$                                                                             |
| $\text{LiSc}(\text{BH}_4)_4$                                        | P-42c              | $a = 6.08$<br>$c = 12.03$                                                                                | $a = 6.45$<br>$c = 11.95$                                                                             |
| $\text{Mg}(\text{BH}_4)_2(\text{NH}_3)_2$                           | Pbca               | $a = 17.49$<br>$b = 9.41$<br>$c = 8.73$                                                                  | $a = 17.73$<br>$b = 9.35$<br>$c = 8.68$                                                               |
| $(\text{NH}_4)\text{B}(\text{CN})_4$                                | I41/a              | $a = 7.132$<br>$c = 14.745$                                                                              | $a = 7.453$<br>$c = 14.617$                                                                           |
| $\text{NaAl}(\text{NH}_2)_4$                                        | P2 <sub>1</sub> /c | $a = 7.328$<br>$b = 6.047$<br>$c = 13.151$<br>$\beta = 94.04$                                            | $a = 6.565$<br>$b = 6.353$<br>$c = 15.362$<br>$\beta = 94.3$                                          |
| $\text{NaB}(\text{CN})_4$                                           | Fd-3mZ             | $a = 11.68$                                                                                              | $a = 11.874$                                                                                          |
| $\text{Si}_2\text{C}_7\text{H}_{18}\text{N}_2$                      | P2 <sub>1</sub> /c | $a = 9.71$<br>$b = 11.11$<br>$c = 11.88$<br>$\beta = 102.3$                                              | $a = 10.143$<br>$b = 11.599$<br>$c = 12.422$<br>$\beta = 103.1$                                       |
| $\text{VC}_8\text{H}_{24}\text{N}_4$                                | P-1                | $a = 8.29$<br>$b = 12.016$<br>$c = 13.835$<br>$\alpha = 75.662$<br>$\beta = 79.404$<br>$\gamma = 84.966$ | $a = 8.637$<br>$b = 12.503$<br>$c = 14.479$<br>$\alpha = 75.89$<br>$\beta = 79.47$<br>$\gamma = 85.3$ |
| $\text{LiAlC}_4\text{H}_{16}\text{N}_4$                             | I4 <sub>1</sub>    | $a = 14$<br>$c = 9.275$                                                                                  | $a = 14.128$<br>$c = 9.571$                                                                           |
| $\text{LiSi}_3\text{C}_9\text{H}_{27}\text{N}_2$                    | P-1                | $a = 8.776$<br>$b = 9.579$<br>$c = 21.949$                                                               | $a = 9.077$<br>$b = 9.875$<br>$c = 22.544$                                                            |

|                                                             |                 |                                                                  |                                                               |
|-------------------------------------------------------------|-----------------|------------------------------------------------------------------|---------------------------------------------------------------|
|                                                             |                 | $\alpha = 100.84$<br>$\beta = 92.18$<br>$\gamma = 115.67$        | $\alpha = 101.16$<br>$\beta = 91.95$<br>$\gamma = 115$        |
| $\text{Si}_2\text{B}_2\text{C}_{12}\text{H}_{37}\text{N}_5$ | $\text{P}2_1/c$ | $a = 15.785$<br>$b = 11.966$<br>$c = 11.804$<br>$\beta = 102.19$ | $a = 16.2$<br>$b = 12.212$<br>$c = 12.205$<br>$\beta = 102.3$ |

**Table S3:** Multi-step reactions in which individual reactions are independent (not linked via intermediate compounds).  $\Delta G_{\max} - \Delta G_{\min}$  is the difference between  $\Delta G$  for the final step and the first step in a multi-step reaction. The  $T\Delta S_{\text{conf}}$  term is given only for compounds known to have partial occupancy.

| Class I: (reactions having $(\Delta G_{\max} - \Delta G_{\min}) \leq 10 \text{ kJ/mol H}_2$ ) |                                                                                                                                                                                                                       |       |                                                                    |                                                                 |
|-----------------------------------------------------------------------------------------------|-----------------------------------------------------------------------------------------------------------------------------------------------------------------------------------------------------------------------|-------|--------------------------------------------------------------------|-----------------------------------------------------------------|
| No.                                                                                           | Reaction                                                                                                                                                                                                              | wt. % | $\Delta U_0 (T\Delta S_{\text{conf}})$<br>(kJ/mol H <sub>2</sub> ) | $\Delta G_{\max} - \Delta G_{\min}$<br>(kJ/mol H <sub>2</sub> ) |
| 1                                                                                             | Entire reaction<br>$6\text{LiBH}_4 + 15\text{Mg}(\text{BH}_4)_2 + \text{MgH}_2 + 8\text{Si} \rightarrow 8\text{Mg}_2\text{Si} + 3\text{Li}_2\text{B}_{12}\text{H}_{12} + 55\text{H}_2$                                | 9.31  |                                                                    | 1.6                                                             |
|                                                                                               | 1 <sup>st</sup> step<br>$\text{MgH}_2 + 0.5\text{Si} \rightarrow 0.5\text{Mg}_2\text{Si} + \text{H}_2$                                                                                                                | 0.169 | 37.6                                                               |                                                                 |
|                                                                                               | 2 <sup>nd</sup> step<br>$6\text{LiBH}_4 + 15\text{Mg}(\text{BH}_4)_2 + 7.5\text{Si} \rightarrow 7.5\text{Mg}_2\text{Si} + 3\text{Li}_2\text{B}_{12}\text{H}_{12} + 54\text{H}_2$                                      | 9.136 | 39.2                                                               |                                                                 |
| 2                                                                                             | Entire reaction<br>$18.33\text{Si} + 40\text{Mg}(\text{BH}_4)_2 + 4\text{Ca}(\text{BH}_4)_2 \rightarrow 18.33\text{Mg}_2\text{Si} + 3.33\text{MgB}_{12}\text{H}_{12} + 4\text{CaB}_{12}\text{H}_{12} + 132\text{H}_2$ | 9.01  |                                                                    | 2.4                                                             |
|                                                                                               | 1 <sup>st</sup> step<br>$10\text{Si} + 20\text{Mg}(\text{BH}_4)_2 + 4\text{Ca}(\text{BH}_4)_2 \rightarrow 10\text{Mg}_2\text{Si} + 4\text{CaB}_{12}\text{H}_{12} + 72\text{H}_2$                                      | 4.914 | 41.2                                                               |                                                                 |
|                                                                                               | 2 <sup>nd</sup> step<br>$8.33\text{Si} + 20\text{Mg}(\text{BH}_4)_2 \rightarrow 8.33\text{Mg}_2\text{Si} + 3.33\text{MgB}_{12}\text{H}_{12} + 60\text{H}_2$                                                           | 4.095 | 43.6                                                               |                                                                 |
| 3                                                                                             | Entire reaction<br>$5\text{MgH}_2 + 10\text{Si} + 15\text{Mg}(\text{BH}_4)_2 + 6\text{KBH}_4 \rightarrow 10\text{Mg}_2\text{Si} + 3\text{K}_2\text{B}_{12}\text{H}_{12} + 59\text{H}_2$                               | 7.69  |                                                                    | 2.6                                                             |
|                                                                                               | 1 <sup>st</sup> step<br>$5\text{MgH}_2 + 2.5\text{Si} \rightarrow 2.5\text{Mg}_2\text{Si} + 5\text{H}_2$                                                                                                              | 0.652 | 37.6                                                               |                                                                 |
|                                                                                               | 2 <sup>nd</sup> step<br>$7.5\text{Si} + 15\text{Mg}(\text{BH}_4)_2 + 6\text{KBH}_4 \rightarrow 7.5\text{Mg}_2\text{Si} + 3\text{K}_2\text{B}_{12}\text{H}_{12} + 54\text{H}_2$                                        | 7.042 | 37.3 (-2.87)                                                       |                                                                 |
| 4                                                                                             | Entire reaction<br>$35\text{Si} + 80\text{Mg}(\text{BH}_4)_2 + 8\text{KBH}_4 \rightarrow 35\text{Mg}_2\text{Si} + 10\text{MgB}_{12}\text{H}_{12} + 4\text{K}_2\text{B}_{12}\text{H}_{12} + 252\text{H}_2$             | 8.86  |                                                                    | 3.5                                                             |
|                                                                                               | 1 <sup>st</sup> step<br>$10\text{Si} + 20\text{Mg}(\text{BH}_4)_2 + 8\text{KBH}_4 \rightarrow 10\text{Mg}_2\text{Si} + 4\text{K}_2\text{B}_{12}\text{H}_{12} + 72\text{H}_2$                                          | 2.532 | 37.3 (-2.9)                                                        |                                                                 |
|                                                                                               | 2 <sup>nd</sup> step<br>$25\text{Si} + 60\text{Mg}(\text{BH}_4)_2 \rightarrow 25\text{Mg}_2\text{Si} + 10\text{MgB}_{12}\text{H}_{12} + 180\text{H}_2$                                                                | 6.329 | 43.6                                                               |                                                                 |



|   |                                                                                                                                                                                                                                |       |       |     |
|---|--------------------------------------------------------------------------------------------------------------------------------------------------------------------------------------------------------------------------------|-------|-------|-----|
| 5 | Entire reaction<br>$16\text{LiBH}_4 + 28.33\text{Si} + 60\text{Mg}(\text{BH}_4)_2 \rightarrow 28.33\text{Mg}_2\text{Si} + 8\text{Li}_2\text{B}_{12}\text{H}_{12} + 3.33\text{MgB}_{12}\text{H}_{12} + 204\text{H}_2$           | 9.38  |       | 4.5 |
|   | 1 <sup>st</sup> step<br>$16\text{LiBH}_4 + 20\text{Si} + 40\text{Mg}(\text{BH}_4)_2 \rightarrow 20\text{Mg}_2\text{Si} + 8\text{Li}_2\text{B}_{12}\text{H}_{12} + 144\text{H}_2$                                               | 6.622 | 39.2  |     |
|   | 2 <sup>nd</sup> step<br>$8.33\text{Si} + 20\text{Mg}(\text{BH}_4)_2 \rightarrow 8.33\text{Mg}_2\text{Si} + 3.33\text{MgB}_{12}\text{H}_{12} + 60\text{H}_2$                                                                    | 2.759 | 43.62 |     |
| 6 | Entire reaction<br>$25\text{MgH}_2 + \text{NaMgH}_3 + 13\text{Mg}(\text{NH}_2)_2 \rightarrow \text{NaH} + 13\text{Mg}_3\text{N}_2 + 52\text{H}_2$                                                                              | 7.28  |       | 5.3 |
|   | 1 <sup>st</sup> step<br>$25\text{MgH}_2 + 12.5\text{Mg}(\text{NH}_2)_2 \rightarrow 12.5\text{Mg}_3\text{N}_2 + 50\text{H}_2$                                                                                                   | 6.996 | 26    |     |
|   | 2 <sup>nd</sup> step<br>$\text{NaMgH}_3 + 0.5\text{Mg}(\text{NH}_2)_2 \rightarrow \text{NaH} + 0.5\text{Mg}_3\text{N}_2 + 2\text{H}_2$                                                                                         | 0.28  | 31.3  |     |
| 7 | Entire reaction<br>$4\text{MgH}_2 + 47\text{Si} + 108\text{Mg}(\text{BH}_4)_2 \rightarrow 47\text{Mg}_2\text{Si} + 18\text{MgB}_{12}\text{H}_{12} + 328\text{H}_2$                                                             | 9.11  |       | 6.1 |
|   | 1 <sup>st</sup> step<br>$4\text{MgH}_2 + 2\text{Si} \rightarrow 2\text{Mg}_2\text{Si} + 4\text{H}_2$                                                                                                                           | 0.111 | 37.6  |     |
|   | 2 <sup>nd</sup> step<br>$45\text{Si} + 108\text{Mg}(\text{BH}_4)_2 \rightarrow 45\text{Mg}_2\text{Si} + 18\text{MgB}_{12}\text{H}_{12} + 324\text{H}_2$                                                                        | 9.002 | 43.6  |     |
| 8 | Entire reaction<br>$2\text{LiBH}_4 + \text{MgH}_2 + 7\text{Mg}(\text{BH}_4)_2 + 3.83\text{Si} \rightarrow 3.83\text{Mg}_2\text{Si} + \text{Li}_2\text{B}_{12}\text{H}_{12} + 0.33\text{MgB}_{12}\text{H}_{12} + 25\text{H}_2$  | 9.07  |       | 6.1 |
|   | 1 <sup>st</sup> step<br>$\text{MgH}_2 + 0.5\text{Si} \rightarrow 0.5\text{Mg}_2\text{Si} + \text{H}_2$                                                                                                                         | 0.363 | 37.6  |     |
|   | 2 <sup>nd</sup> step<br>$2\text{LiBH}_4 + 5\text{Mg}(\text{BH}_4)_2 + 2.5\text{Si} \rightarrow 2.5\text{Mg}_2\text{Si} + \text{Li}_2\text{B}_{12}\text{H}_{12} + 18\text{H}_2$                                                 | 6.533 | 39.2  |     |
|   | 3 <sup>rd</sup> step<br>$2\text{Mg}(\text{BH}_4)_2 + 0.83\text{Si} \rightarrow 0.83\text{Mg}_2\text{Si} + 0.33\text{MgB}_{12}\text{H}_{12} + 6\text{H}_2$                                                                      | 2.178 | 43.6  |     |
| 9 | Entire reaction<br>$\text{MgH}_2 + 6\text{Mg}(\text{BH}_4)_2 + \text{Ca}(\text{BH}_4)_2 + 3.42\text{Si} \rightarrow 3.42\text{Mg}_2\text{Si} + 0.17\text{MgB}_{12}\text{H}_{12} + \text{CaB}_{12}\text{H}_{12} + 22\text{H}_2$ | 8.6   |       | 6.1 |
|   | 1 <sup>st</sup> step<br>$\text{MgH}_2 + 0.5\text{Si} \rightarrow 0.5\text{Mg}_2\text{Si} + \text{H}_2$                                                                                                                         | 0.391 | 37.6  |     |

|                                                                                                                                                        |                                                                                                                                                                                                            |       |       |      |
|--------------------------------------------------------------------------------------------------------------------------------------------------------|------------------------------------------------------------------------------------------------------------------------------------------------------------------------------------------------------------|-------|-------|------|
|                                                                                                                                                        | 2 <sup>nd</sup> step<br>$5\text{Mg}(\text{BH}_4)_2 + \text{Ca}(\text{BH}_4)_2 + 2.5\text{Si} \rightarrow 2.5\text{Mg}_2\text{Si} + \text{CaB}_{12}\text{H}_{12} + 18\text{H}_2$                            | 7.033 | 41.2  |      |
|                                                                                                                                                        | 3 <sup>rd</sup> step<br>$\text{Mg}(\text{BH}_4)_2 + 0.42\text{Si} \rightarrow 0.42\text{Mg}_2\text{Si} + 0.17\text{MgB}_{12}\text{H}_{12} + 3\text{H}_2$                                                   | 1.172 | 43.62 |      |
| 10                                                                                                                                                     | Entire reaction<br>$46\text{LiBH}_4 + 10\text{Mg}(\text{BH}_4)_2 + 5\text{Si} \rightarrow 35\text{LiH} + 5\text{Mg}_2\text{Si} + 5.5\text{Li}_2\text{B}_{12}\text{H}_{12} + 81.5\text{H}_2$                | 9.77  |       | 8    |
|                                                                                                                                                        | 1 <sup>st</sup> step<br>$4\text{LiBH}_4 + 10\text{Mg}(\text{BH}_4)_2 + 5\text{Si} \rightarrow 5\text{Mg}_2\text{Si} + 2\text{Li}_2\text{B}_{12}\text{H}_{12} + 36\text{H}_2$                               | 4.314 | 39.2  |      |
|                                                                                                                                                        | 2 <sup>nd</sup> step<br>$42\text{LiBH}_4 \rightarrow 35\text{LiH} + 3.5\text{Li}_2\text{B}_{12}\text{H}_{12} + 45.5\text{H}_2$                                                                             | 5.452 | 47.2  |      |
| 11                                                                                                                                                     | Entire reaction<br>$12\text{LiBH}_4 + \text{MgH}_2 + \text{Mg}(\text{BH}_4)_2 + \text{Si} \rightarrow 9.67\text{LiH} + \text{Mg}_2\text{Si} + 1.17\text{Li}_2\text{B}_{12}\text{H}_{12} + 17.17\text{H}_2$ | 9.36  |       | 9.6  |
|                                                                                                                                                        | 1 <sup>st</sup> step<br>$\text{MgH}_2 + 0.5\text{Si} \rightarrow 0.5\text{Mg}_2\text{Si} + \text{H}_2$                                                                                                     | 0.545 | 37.6  |      |
|                                                                                                                                                        | 2 <sup>nd</sup> step<br>$0.4\text{LiBH}_4 + \text{Mg}(\text{BH}_4)_2 + 0.5\text{Si} \rightarrow 0.5\text{Mg}_2\text{Si} + 0.2\text{Li}_2\text{B}_{12}\text{H}_{12} + 3.6\text{H}_2$                        | 1.963 | 39.2  |      |
|                                                                                                                                                        | 3 <sup>rd</sup> step<br>$11.6\text{LiBH}_4 \rightarrow 9.67\text{LiH} + 0.97\text{Li}_2\text{B}_{12}\text{H}_{12} + 12.57\text{H}_2$                                                                       | 6.851 | 47.16 |      |
| 12                                                                                                                                                     | Entire reaction<br>$10\text{LiBH}_4 + 2\text{MgH}_2 + \text{Si} \rightarrow 8.33\text{LiH} + \text{Mg}_2\text{Si} + 0.83\text{Li}_2\text{B}_{12}\text{H}_{12} + 12.83\text{H}_2$                           | 8.67  |       | 9.6  |
|                                                                                                                                                        | 1 <sup>st</sup> step<br>$2\text{MgH}_2 + \text{Si} \rightarrow \text{Mg}_2\text{Si} + 2\text{H}_2$                                                                                                         | 1.35  | 37.6  |      |
|                                                                                                                                                        | 2 <sup>nd</sup> step<br>$10\text{LiBH}_4 \rightarrow 8.33\text{LiH} + 0.83\text{Li}_2\text{B}_{12}\text{H}_{12} + 10.83\text{H}_2$                                                                         | 7.315 | 47.2  |      |
| <b>Class II: (reactions having <math>10 \text{ kJ/mol H}_2 \leq (\Delta G_{\text{max}} - \Delta G_{\text{min}}) \leq 20 \text{ kJ/mol H}_2</math>)</b> |                                                                                                                                                                                                            |       |       |      |
| 1                                                                                                                                                      | Entire reaction<br>$33\text{MgH}_2 + 17\text{Mg}(\text{NH}_2)_2 + 2\text{KMgH}_3 \rightarrow 17\text{Mg}_3\text{N}_2 + \text{K}_2\text{MgH}_4 + 68\text{H}_2$                                              | 7     |       | 12.6 |
|                                                                                                                                                        | 1 <sup>st</sup> step<br>$33\text{MgH}_2 + 16.5\text{Mg}(\text{NH}_2)_2 \rightarrow 16.5\text{Mg}_3\text{N}_2 + 66\text{H}_2$                                                                               | 6.791 | 26    |      |
|                                                                                                                                                        | 2 <sup>nd</sup> step<br>$0.5\text{Mg}(\text{NH}_2)_2 + 2\text{KMgH}_3 \rightarrow 0.5\text{Mg}_3\text{N}_2 + \text{K}_2\text{MgH}_4 + 2\text{H}_2$                                                         | 0.206 | 38.6  |      |
| 2                                                                                                                                                      | Entire reaction<br>$10\text{MgH}_2 + \text{NaMgH}_3 + 6\text{Mg}(\text{NH}_2)_2 + 2\text{KMgH}_3 \rightarrow \text{NaH} + 6\text{Mg}_3\text{N}_2 + \text{K}_2\text{MgH}_4 + 24\text{H}_2$                  | 6.17  |       | 12.6 |

|  |                                                                                                                                                    |       |      |  |
|--|----------------------------------------------------------------------------------------------------------------------------------------------------|-------|------|--|
|  | 1 <sup>st</sup> step<br>$10\text{MgH}_2 + 5\text{Mg}(\text{NH}_2)_2 \rightarrow 5\text{Mg}_3\text{N}_2 + 20\text{H}_2$                             | 5.14  | 26   |  |
|  | 2 <sup>nd</sup> step<br>$\text{NaMgH}_3 + 0.5\text{Mg}(\text{NH}_2)_2 \rightarrow \text{NaH} + 0.5\text{Mg}_3\text{N}_2 + 2\text{H}_2$             | 0.514 | 31.3 |  |
|  | 3 <sup>rd</sup> step<br>$0.5\text{Mg}(\text{NH}_2)_2 + 2\text{KMgH}_3 \rightarrow 0.5\text{Mg}_3\text{N}_2 + \text{K}_2\text{MgH}_4 + 2\text{H}_2$ | 0.514 | 38.6 |  |

### Estimated reaction temperatures of metal hydride mixtures

We estimated the reaction temperatures of the 72 of the single-step reactions listed in Table S2 and every step associated with the 23 multi-step reactions in Tables 3 and S3 as described in Eq. (3) of the text. The reaction temperatures of  $\text{MgH}_2/\text{Mg}(\text{NH}_2)_2$  and  $\text{LiNH}_2/\text{LiH}/\text{KBH}_4$  mixtures for a  $\text{H}_2$  pressure of 1 bar were taken from the van't Hoff plots in Figs. 2 and 3. Figures S1—S4 show the estimated temperature needed to generate a partial pressure of  $\text{H}_2$  of 1 bar for each reaction ( $T_{\text{est}}$ ) as a function of a  $\text{H}_2$  capacity for the single-step reactions in each category listed in Table 2. Figures S5–S7 show the cumulative  $\text{H}_2$  capacity of each reaction as a function of  $T_{\text{est}}$  for the multi-step reactions where the relevant steps are independent without any connection between the steps. Figures S5 and S6 show the reactions included in Class I of Table S3 and Fig. S7 shows the reactions included in Class II of Table S3.

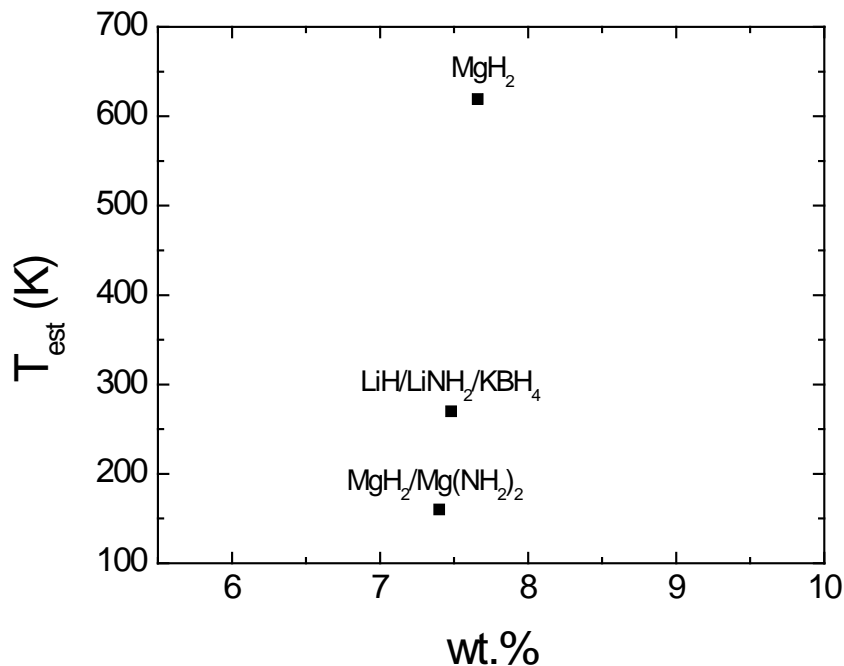

**Figure S1.** The estimated temperature for generating a partial pressure of  $\text{H}_2$  of 1 bar ( $T_{\text{est}}$ ) as a function of  $\text{H}_2$  capacity (wt.%) for the “interesting reactions” in Table 2.

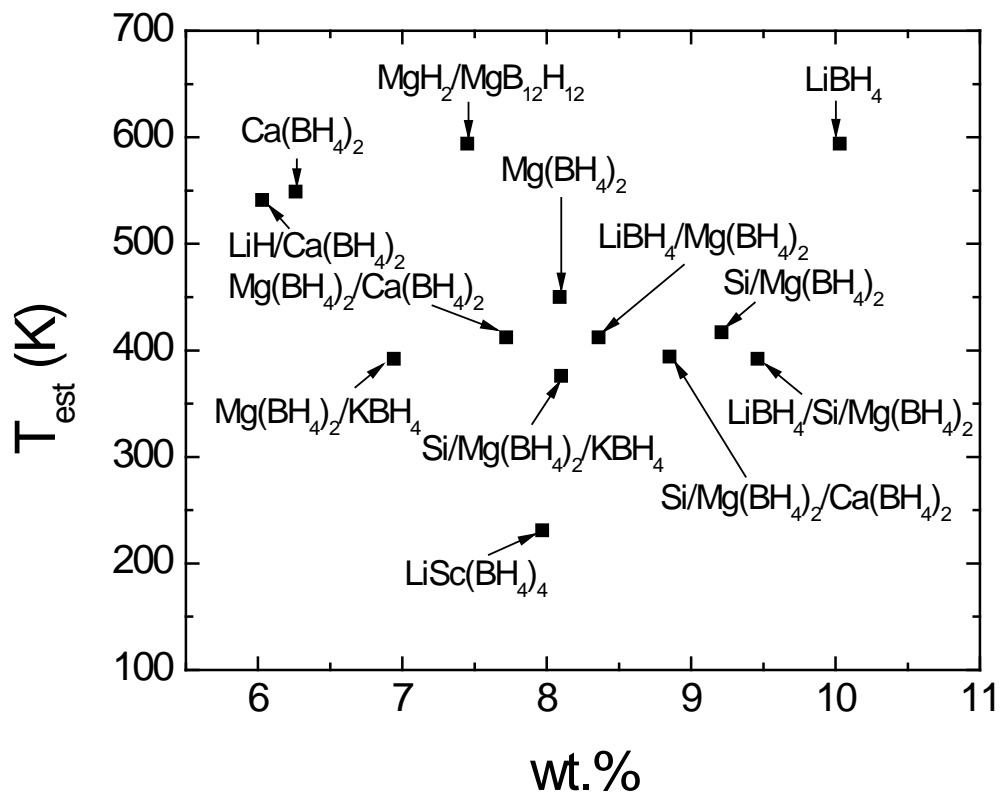

**Figure S2.** The estimated temperature for generating a partial pressure of  $\text{H}_2$  of 1 bar ( $T_{\text{est}}$ ) as a function of  $\text{H}_2$  capacity (wt.%) for thirteen reactions involving  $\text{B}_{12}\text{H}_{12}$  species in Table 2.

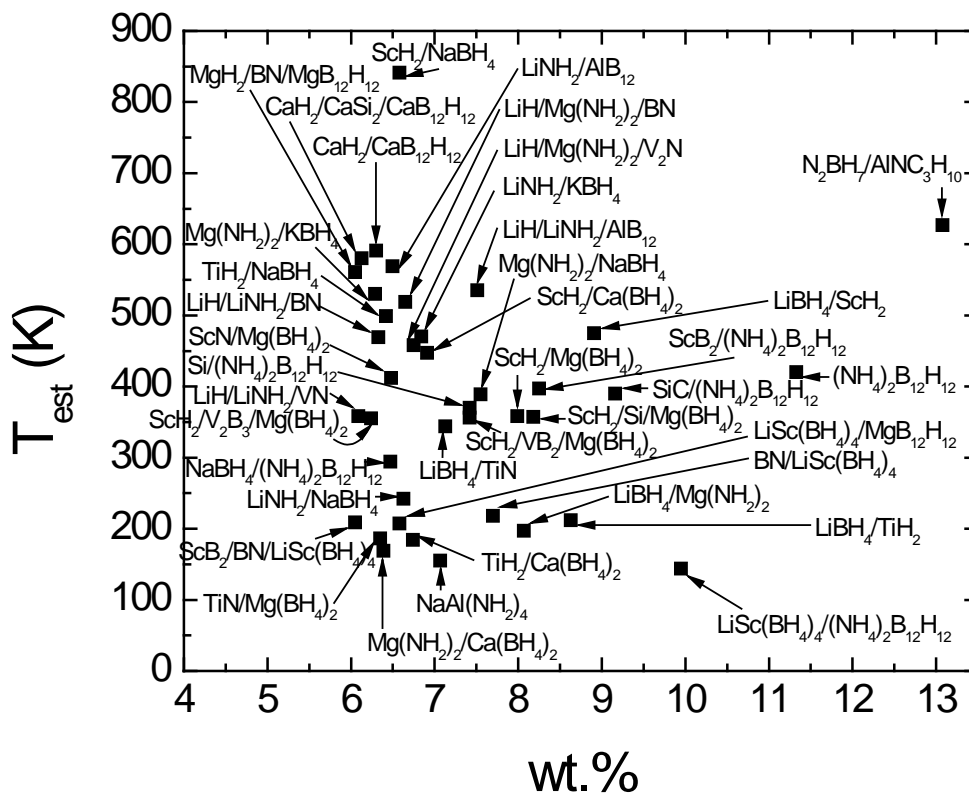

**Figure S3.** The estimated temperature for generating a partial pressure of H<sub>2</sub> of 1 bar ( $T_{\text{est}}$ ) as a function of H<sub>2</sub> capacity (wt.%) for the 39 reactions involving refractory materials in Table 2.

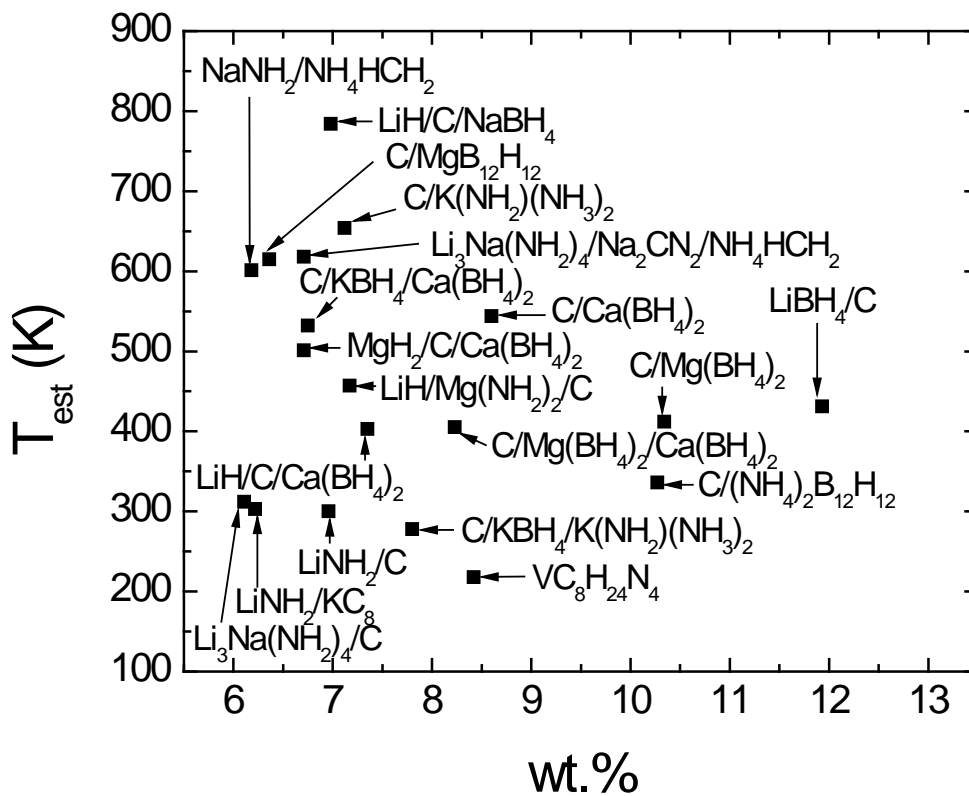

**Figure S4.** The estimated temperature for generating a partial pressure of H<sub>2</sub> of 1 bar (T<sub>est</sub>) as a function of H<sub>2</sub> capacity (wt.%) for the nineteen reactions involving C in Table 2.

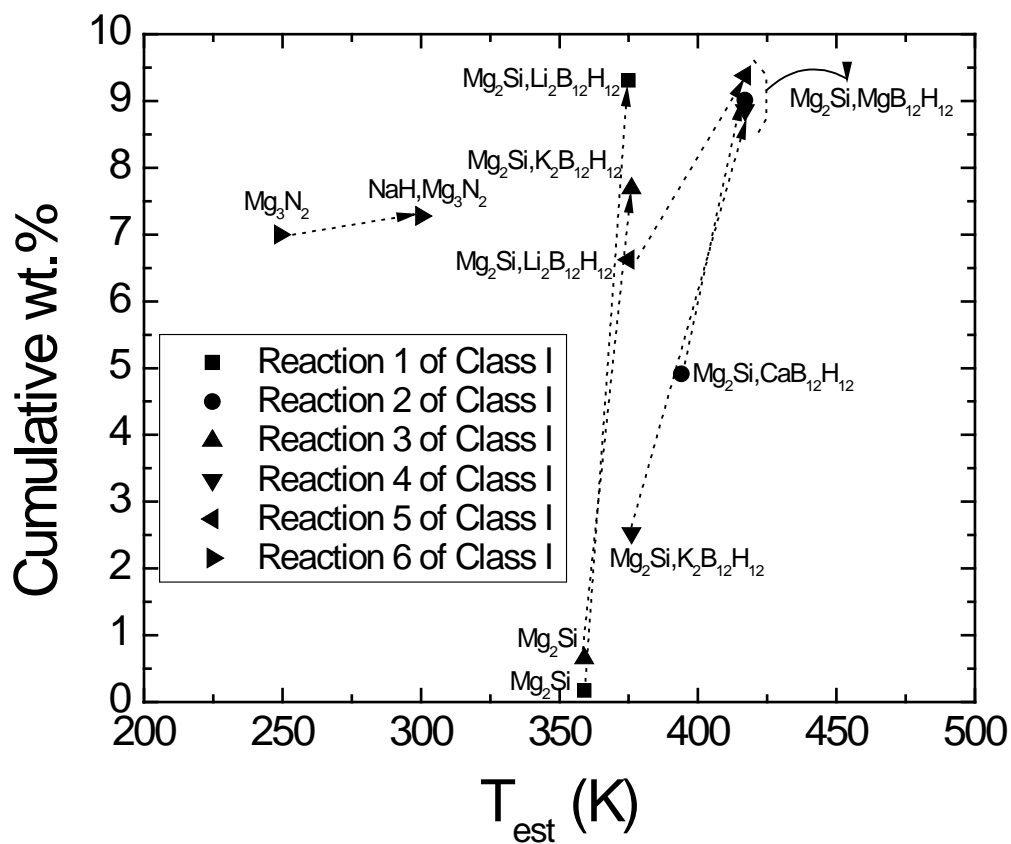

**Figure S5.** The cumulative H<sub>2</sub> capacity (wt.%) as a function of the estimated temperature for generating a partial pressure of H<sub>2</sub> of 1 bar (T<sub>est</sub>) for the first six reactions in Class I of Table S3.



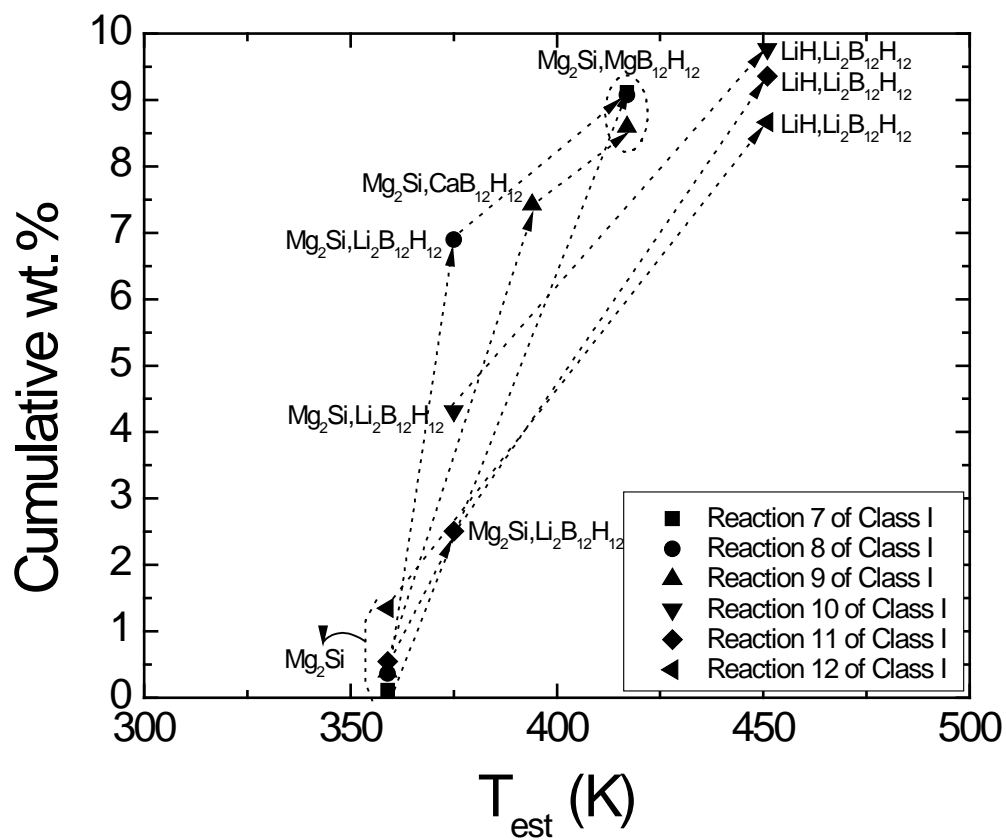

**Figure S6.** The cumulative H<sub>2</sub> capacity (wt.%) as a function of the estimated temperature for generating a partial pressure of H<sub>2</sub> of 1 bar (T<sub>est</sub>) for the second six reactions in Class I of Table S3.

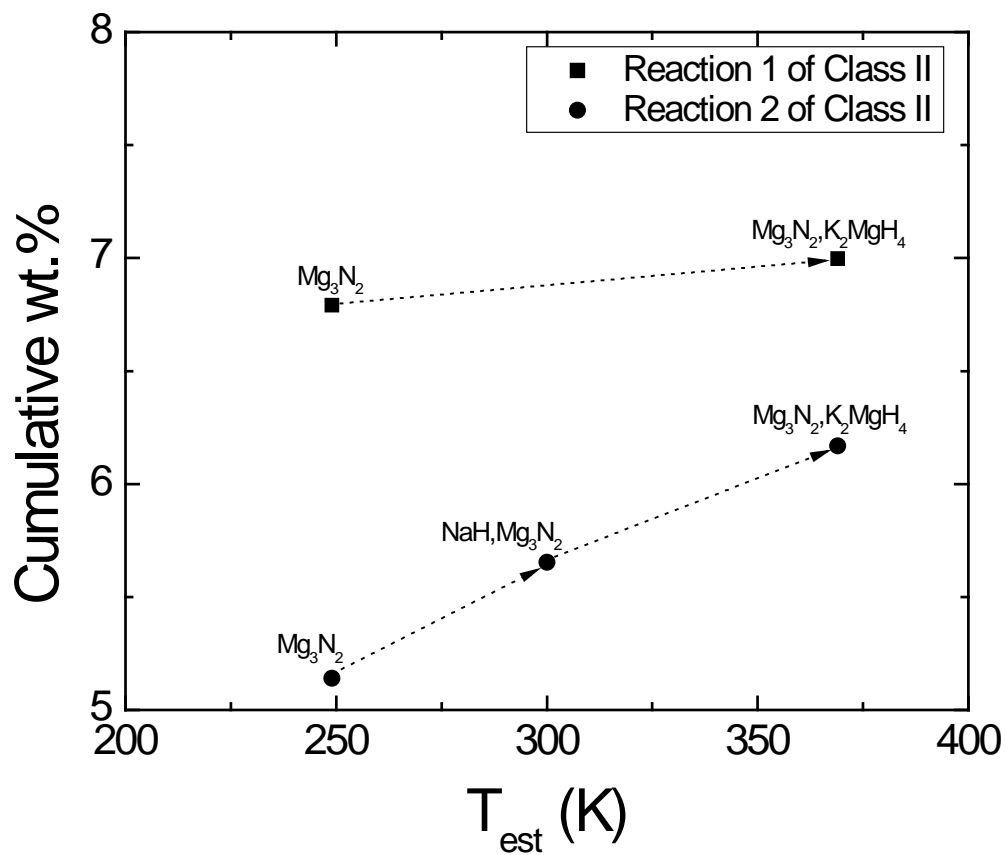

**Figure S7.** The cumulative H<sub>2</sub> capacity (wt.%) as a function of the estimated temperature for generating a partial pressure of H<sub>2</sub> of 1 bar (T<sub>est</sub>) for the two reactions in Class II of Table S3.
